# Supplementary material for: A novel zwitterionic bioceramic with dual antibacterial capability
Source: Royal Society of Chemistry journal article supplement (doi:10.1039/c4tb00690a), 2014-01-01
Supplement: c4tb00690a1.pdf [file c4tb00690a1.pdf]

# SUPPORTING INFORMATION

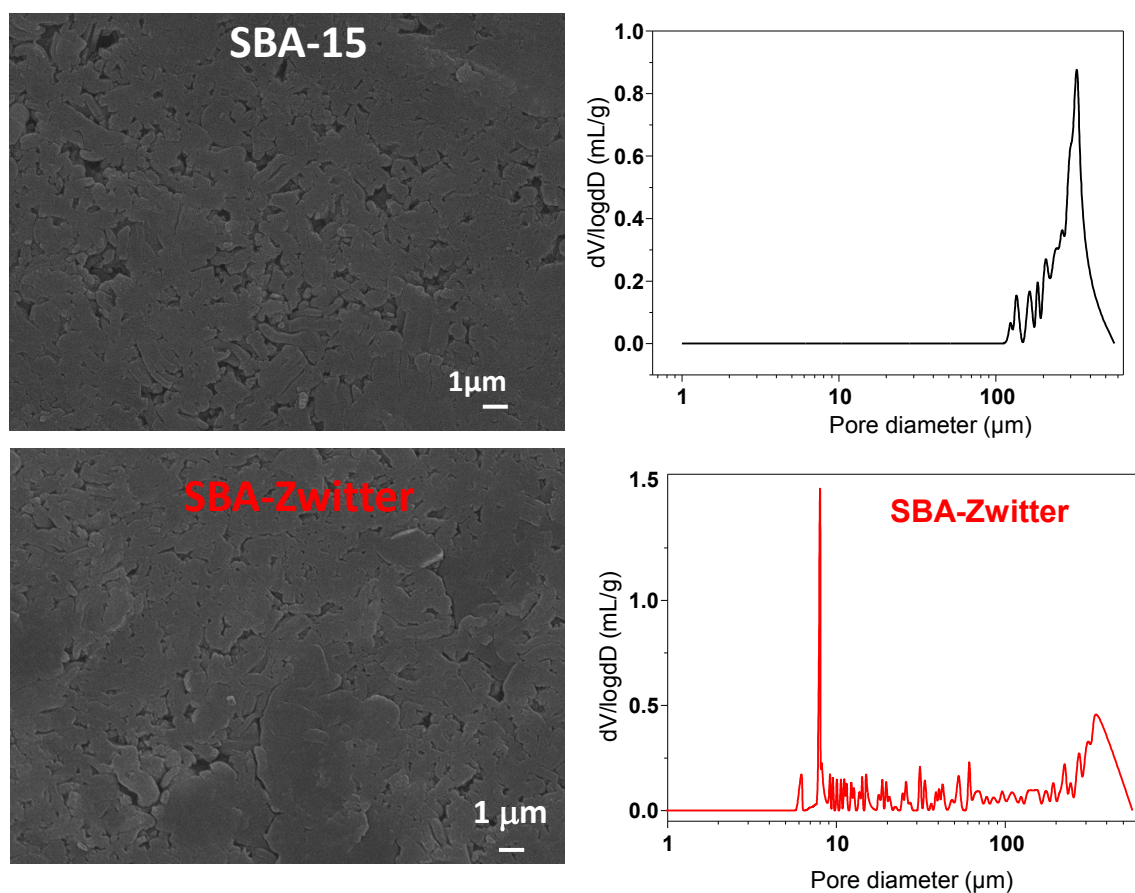

**Figure S1.** (A) SEM micrographs and (B) pore size distributions, determined by Hg intrusion porosimetry in the 1-600  $\mu\text{m}$  range, for disk-shaped SBA-15 and SBA-Zwitter samples.

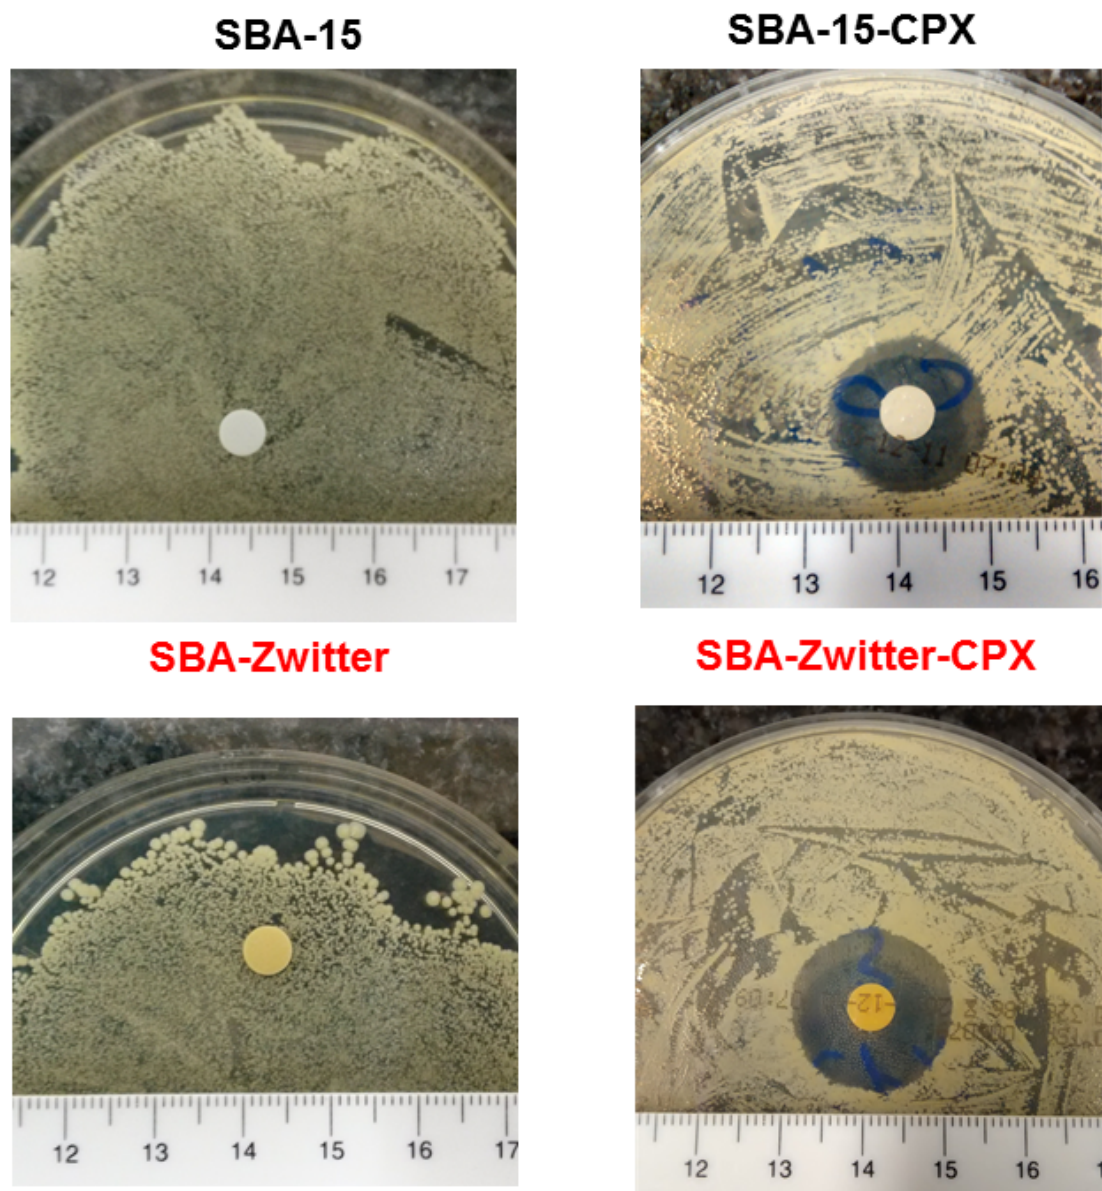

**Figure S2.** Digital images of agar plates after carrying out agar disk diffusion tests (ADT). Left: Cephalexin (CPX)-free SBA-15 and SBA-Zwitter disk-shaped pieces. Right: Cephalexin (CPX)-loaded SBA-15 and SBA-Zwitter materials. Inhibition zones are observed for both antibiotic loaded samples.
